# Supplementary material
Source: HighWire-hosted journal article supplement (https://jmg.bmj.com/content/56/8/513)
Supplement: inline-supplementary-material-5 [file inline-supplementary-material-5.xlsx]

## Sheet: Germline analysis only
Patient #	Analyzed DNA	Age at diagnosis (years)	Tumor type	Benign/ Malignant	Personal and familial history	Germline/Somatic status	Gene	Variant (coding DNA)	Aminoacid change	Type of Variation	Current classification	cDNA analysis	SDHB IHC	SDHA IHC	2-SC IHC
1	Germline	34	Multiple or recurrent PGL	M		germline	SDHA	c.308C>T	p.Ala103Val	missense	class 4		negative	negative
2	Germline	71	Multiple or recurrent PGL	B		germline	SDHA	c.1754G>A	p.Arg585Gln	missense	class 4		negative	negative
3	Germline	30	Single TAP PGL	B		germline	EGLN2	c.615C>T	p.Arg205Arg	synonymous	class 3		negative	negative
4	Germline	33	Single HN PGL	B		germline	SDHA	c.1534C>T	p.Arg512Ter	nonsense	class 5
5	Germline	33	Single HN PGL	B		germline	SDHD	c.1-?_480+?del	p.? (del ex 1-4)	large deletion/duplication	class 5
6	Germline	5	Single TAP PGL	M		germline	VHL	c.245G>T	p.Arg82Leu	missense	class 4
7	Germline	66	Single HN PGL	B		germline	EGLN2	c.786C>T	p.Ala262Ala	missense	class 3
8	Germline	21	Single HN PGL	B		germline	SDHB	c.1-?_72+?del	p.? (del ex1)	large deletion/duplication	class 5
9	Germline	23	Multiple or recurrent PGL	B	Yes (PPGL)	germline	SDHD	c.170-1G>T	p.?	splicesite	class 5		negative	positive
10	Germline	28	Single TAP PGL	B		germline	SDHB	c.73-?_843+?del	p.? (del ex 2-8)	large deletion/duplication	class 5
11	Germline	30	Single TAP PGL	M		germline	SDHB	c.649C>G	p.Arg217Gly	missense	class 3
12	Germline	28	Single HN PGL	B		germline	SDHD	c.242C>T	p.Pro81Leu	missense	class 5		negative	positive
13	Germline	48	Single HN PGL	B		germline	SDHB	c.447G>T	p.Gln149His	missense	class 5		negative	positive
14	Germline	78	Single TAP PGL	B		germline	FH	c.817G>A	p.Ala273Thr	missense	class 4
15	Germline	55	Multiple or recurrent PGL	B		germline	SDHC	c.180-?_241+?del	p.? (del ex4)	large deletion/duplication	class 5
16	Germline	53	Single HN PGL	B		germline	SDHD	c.191_192del	p.Leu64Profs*4	frameshift	class 5
17	Germline	52	Single HN PGL	B		germline	SDHC	c.1A>G	p.Met1?	initiation codon	class 5
18	Germline	38	Multiple or recurrent PGL	B		germline	SDHA	c.1534C>T	p.Arg512Ter	nonsense	class 5
19	Germline	30	Single HN PGL	B		germline	SDHA	c.1741G>A	p.Gly581Arg	missense	class 4		negative	negative
20	Germline	62	Single TAP PGL	B		germline	VHL	c.241C>T	p.Pro81Ser	missense	class 4
21	Germline	55	Single TAP PGL	B		germline	SDHA	c.1696dup	p.Leu566Profs*37	frameshift	class 5		negative	negative
22	Germline	54	Single HN PGL	B		germline	SDHB	c.689G>A	p.Arg230His	missense	class 4
23	Germline	36	Single TAP PGL	B		germline	SDHB	c.15dup	p.Ala6Argfs*57	frameshift	class 5
24	Germline	32	Single TAP PGL	M		germline	SDHA	c.985C>T	p.Arg329Ter	nonsense	class 5
25	Germline	18	Single TAP PGL	B		germline	SDHB	c.591del	p.Ser198Alafs*22	frameshift	class 5
26	Germline	17	Single HN PGL	B		germline	SDHA	c.1663+3G>C	p.?	intronic	class 5	abnormal splicing	negative	negative
27	Germline	66	Single HN PGL	B		germline	SDHC	c.120G>A	p.Arg40Arg	synonymous	class 3
28	Germline	38	Single HN PGL	B		germline	SDHD	c.242C>T	p.Pro81Leu	missense	class 5
29	Germline	70	Single HN PGL	B		germline	SDHA	c.710C>T	p.Leu237Pro	missense	class 3
30	Germline	65	Single HN PGL	B		germline	SDHB	c.1-?_843+?del	p.? (del ex 1-8)	large deletion/duplication	class 5
31	Germline	68	Single HN PGL	B		germline	SDHB	c.203G>A	p.Cys68Tyr	missense	class 4
32	Germline	26	Single HN PGL	B		germline	SDHB	c.435del	p.Phe146Serfs*12	frameshift	class 5
32	Germline	26	Single HN PGL	B		germline	SDHD	c.158C>T	p.Pro53Leu	missense	class 3
33	Germline	70	Single HN PGL	B		germline	SDHA	c.1799G>A	p.Arg600Gln	missense	class 3
34	Germline	38	Single TAP PGL	B		germline	SDHA	c.1658_1661del	p.Asp553Glyfs*18	frameshift	class 4
35	Germline	63	Single HN PGL	B		germline	SDHA	c.1365C>G	p.Asn455Lys	missense	class 4		negative	negative
36	Germline	38	Single HN PGL	B		germline	SDHD	c.3G>A	p.Met1?	initiation codon	class 4
37	Germline	53	Single TAP PGL	B		germline	RET	c.2372A>T	p.Tyr791Phe	missense	class 3
38	Germline	48	Multiple or recurrent PGL	B	Yes (PPGL)	germline	SDHD	c.242C>T	p.Pro81Leu	missense	class 5
39	Germline	40	Single HN PGL	B		germline	FH	c.217G>A	p.Val73Met	missense	class 3
40	Germline	49	Single HN PGL	B		germline	SDHB	c.591del	p.Ser198Alafs*22	frameshift	class 5
41	Germline	27	Single HN PGL	B		germline	SDHB	c.723C>A	p.Tyr241Ter	nonsense	class 4
42	Germline	13	Single TAP PGL	M		germline	SDHB	c.93dup	p.Ala32Serfs*31	frameshift	class 4
43	Germline	52	Single HN PGL	B		germline	SDHA	c.553C>T	p.Gln185Ter	nonsense	class 5		negative	negative
44	Germline	8	Single TAP PGL	B		germline	SDHB	c.201-?_286+?del	p.? (del ex3)	large deletion/duplication	class 4
45	Germline	26	Single TAP PGL	B		germline	SDHB	c.392del	p.Pro131Hisfs*5	frameshift	class 5
46	Germline	76	Single HN PGL	B		germline	SDHB	c.1-?_72+?del	p.? (del ex1)	large deletion/duplication	class 5
47	Germline	31	Multiple or recurrent PGL	B		germline	SDHD	c.418del	p.Cys140Alafs*28	frameshift	class 5
48	Germline	60	Single HN PGL	B		germline	SDHC	c.397C>T	p.Arg133Ter	nonsense	class 5		negative	positive
49	Germline	25	Single HN PGL	B		germline	SDHB	c.713del	p.Phe238Serfs*10	frameshift	class 5
50	Germline	34	Single HN PGL	B		germline	SDHC	c.473T>C	p.Leu158Pro	missense	class 3
51	Germline	72	Single HN PGL	B		germline	TMEM127	c.598C>A	p.Pro200Thr	missense	class 3
52	Germline	50	Single TAP PGL	M		germline	SDHB	c.255del	p.Thr86Leufs*2	frameshift	class 5
53	Germline	17	Multiple or recurrent PGL	B		germline	SDHB	c.1-?_843+?del	p.? (del ex 1-8)	large deletion/duplication	class 5		negative	positive
54	Germline	15	Multiple or recurrent PGL	M		germline	SDHB	c.287-?_843+?del	p.? (del ex 4-8)	large deletion/duplication	class 5
55	Germline	46	Single TAP PGL	B		germline	SDHB	c.332_334del	p.Leu111_Ala112delinsPro	in frame delins	class 3
56	Germline	34	Single HN PGL	B		germline	SDHA	c.1432_1432+1del	p.?	splicesite	class 4
57	Germline	34	Single HN PGL	B		germline	SDHA	c.223C>T	p.Arg75Ter	nonsense	class 5		negative	negative
58	Germline	20	Single TAP PGL	B		germline	SDHB	c.72+1G>A	p.?	splicesite	class 5
59	Germline	51	Multiple or recurrent PGL	B		germline	SDHD	c.102del	p.Leu35Phefs*51	frameshift	class 4
60	Germline	27	Multiple or recurrent PGL	B		germline	NF1	c.2033dup	p.Ile679Aspfs*21	frameshift	class 5
60	Germline	27	Multiple or recurrent PGL	B		germline	SDHD	c.170-1G>T	p.?	splicesite	class 5
61	Germline	39	Multiple or recurrent PGL	M		germline	SDHB	c.1-?_72+?del	p.? (del ex1)	large deletion/duplication	class 5
62	Germline	38	Single HN PGL	B		germline	SDHD	c.242C>T	p.Pro81Leu	missense	class 5		negative	positive
63	Germline	28	Single HN PGL	B		germline	SDHC	c.374T>G	p.Met125Arg	missense	class 3
64	Germline	36	Single HN PGL	B		germline	SDHD	c.242C>T	p.Pro81Leu	missense	class 5
65	Germline	16	Single TAP PGL	B		germline	SDHB	c.718_721del	p.Leu240Thrfs*7	frameshift	class 4
66	Germline	35	Single HN PGL	B	Yes (PPGL)	germline	SDHC	c.164A>G	p.His55Arg	missense	class 3
67	Germline	17	Single HN PGL	B		germline	SDHA	c.91C>T	p.Arg31Ter	nonsense	class 5
68	Germline	25	Single PCC	B		germline	RET	c.2372A>T	p.Tyr791Phe	missense	class 3
69	Germline	10	Bilateral PCC	B		germline	VHL	c.467A>C	p.Tyr156Ser	missense	class 4
70	Germline	55	Single PCC	B		germline	EPAS1	c.1635C>G	p.Ile545Met	missense	class 3				positive
70	Germline	55	Single PCC	B		germline	FH	c.151C>T	p.Arg51Trp	missense	class 4				positive
71	Germline	52	Single PCC	B	Yes (PPGL)	germline	VHL	c.466T>C	p.Tyr156His	missense	class 5
72	Germline	21	Single PCC	B	Yes (PPGL)	germline	VHL	c.466T>C	p.Tyr156His	missense	class 5
73	Germline	60	Single PCC	B		germline	MDH2	c.897C>A	p.Ile299Ile	synonymous	class 3
74	Germline	39	Single PCC	B		germline	TMEM127	c.348T>C	p.Phe116Phe	synonymous	class 3
75	Germline	69	Single PCC	B		germline	MAX	c.36+27G>T	p.?	intronic	class 3
76	Germline	48	Single PCC	B		germline	RET	c.1591T>C	p.Cys531Arg	missense	class 5
77	Germline	46	Single PCC	B		germline	RET	c.1529C>T	p.Ala150Val	missense	class 3
78	Germline	21	Single PCC	B		germline	VHL	c.444dup	p.Ala149Cysfs*25	frameshift	class 5
79	Germline	40	Single PCC	B		germline	TMEM127	c.556G>C	p.Ala186Pro	missense	class 3
80	Germline	28	Single PCC	B		germline	SDHB	c.137G>A	p.Arg46Gln	missense	class 5
81	Germline	53	Single PCC	B		germline	RET	c.2498G>A	p.Arg833His	missense	class 3
82	Germline	31	Single PCC	M		germline	MAX	c.3G>A	p.Met1?	initiation codon	class 5
83	Germline	51	Single PCC	B		germline	MDH2	c.628T>G	p.Ser210Ala	missense	class 3
84	Germline	63	Single PCC	B		germline	SDHC	c.120G>A	p.Arg40Arg	synonymous	class 3
85	Germline	49	Single PCC	B		germline	SDHB	c.436T>G	p.Phe146Val	missense	class 3
86	Germline	27	Single PCC	B		germline	VHL	c.191G>C	p.Arg64Pro	missense	class 5
87	Germline	63	Single PCC	B		germline	SDHB	c.700C>T	p.Leu234Leu	synonymous	class 3
88	Germline	35	Single PCC	M		germline	SDHB	c.286+2T>A	p.?	splicesite	class 5
89	Germline	18	Single PCC	B	personal NF1	germline	NF1	c.2445_2446delinsTT	p.Arg815_Arg816delinsSerTer	nonsense	class 5
90	Germline	33	Single PCC	M	personal and familial NF1	germline	NF1	c.1555del	p.Gln519Lysfs*7	frameshift	class 5
91	Germline	44	Single PCC	B		germline	RET	c.884C>T	p.Thr295Met	missense	class 3
92	Germline	31	Single PCC	M	Yes (PPGL)	germline	SDHB	c.620_621del	p.Leu207Argfs*14	frameshift	class 5
93	Germline	69	Single PCC	B		germline	VHL	c.599G>A	p.Arg200Gln	missense	class 3
94	Germline	22	Single PCC	B		germline	MAX	c.223C>T	p.Arg75Ter	nonsense	class 5
95	Germline	9	Single PCC	B	Yes (PPGL)	germline	VHL	c.482G>A	p.Arg161Gln	missense	class 5
96	Germline	47	Single PCC	B		germline	MAX	c.223C>T	p.Arg75Ter	nonsense	class 5
97	Germline	41	Single PCC	B		germline	TMEM127	c.74dup	p.Gln26Alafs*5	frameshift	class 4
98	Germline	29	Single PCC	B		germline	TMEM127	c.30del	p.Gly11Alafs*70	frameshift	class 4
99	Germline	57	Single PCC	B		germline	EGLN1	c.311C>T	p.Ser104Phe	missense	class 3
100	Germline	32	Single PCC	B		germline	EPAS1	c.1057G>A	p.Val353Met	missense	class 3
101	Germline	66	Single PCC	B		germline	SDHA	c.413C>G	p.Ala138Gly	missense	class 3
102	Germline	72	Single PCC	B		germline	SDHB	c.642+17T>C	p.?	intronic	class 3
103	Germline	33	Single PCC	B		germline	TMEM127	c.536T>C	p.Leu179Pro	missense	class 3
104	Germline	28	Single PCC	B		germline	SDHA	c.1799G>A	p.Arg600Gln	missense	class 3
105	Germline	59	Single PCC	B	Yes (PPGL)	germline	MAX	c.233dup	p.Asn78Lysfs*9	frameshift	class 4
106	Germline	14	Single PCC	B	Yes (PPGL)	germline	VHL	c.308C>A	p.Pro103His	missense	class 4
107	Germline	28	Single PCC	B	personal NF1	germline	NF1	c.541C>T	p.Gln181Ter	nonsense	class 5
108	Germline	39	Single PCC	B	personal and familial NF1	germline	NF1	c.7285C>T	p.Arg2429Ter	nonsense	class 5
109	Germline	37	Single PCC	B		germline	RET	c.2370G>T	p.Leu790Phe	missense	class 5
110	Germline	33	Single PCC	B		germline	RET	c.2531G>A	p.Arg844Gln	missense	class 3
111	Germline	69	Single PCC	B	personal NF1	germline	NF1	c.6641+1G>C	p.?	splicesite	class 5
112	Germline	13	Single PCC	B		germline	SDHA	c.1534C>T	p.Arg512Ter	nonsense	class 4
113	Germline	66	Single PCC	B	personal NF1	germline	NF1	c.3916C>T	p.Arg1306Ter	nonsense	class 5
114	Germline	38	Single PCC	B		germline	FH	c.497G>A	p.Gly166Glu	missense	class 3
115	Germline	35	Single PCC	B		germline	VHL	c.341-6C>T	p.?	intronic	class 3
116	Germline	39	Single PCC	B		germline	FH	c.4T>C	p.Tyr2His	missense	class 3
117	Germline	35	Single PCC	B		germline	NF1	c.2054C>A	p.Thr685Asn	missense	class 3
118	Germline	27	Single TAP PGL	B			none
119	Germline	37	Single HN PGL	B			none
120	Germline	18	Single HN PGL	B			none
121	Germline	54	Single TAP PGL	B			none
122	Germline	31	Single HN PGL	B			none
123	Germline	41	Single TAP PGL	B			none
124	Germline	64	Single HN PGL	B			none
125	Germline	41	Multiple or recurrent PGL	B			none
126	Germline	22	Single TAP PGL	B			none
127	Germline	34	Single HN PGL	B			none
128	Germline	25	Single HN PGL	B			none
129	Germline	56	Single TAP PGL	B			none
130	Germline	74	Multiple or recurrent PGL	B			none
131	Germline	23	Single TAP PGL	M			none
132	Germline	33	Single HN PGL	B			none
133	Germline	62	Single HN PGL	B			none
134	Germline	61	Single TAP PGL	B			none
135	Germline	46	Single HN PGL	B			none
136	Germline	82	Single TAP PGL	B			none
137	Germline	68	Single TAP PGL	M			none
138	Germline	31	Single HN PGL	B			none
139	Germline	54	Single HN PGL	B			none
140	Germline	68	Single HN PGL	B			none
141	Germline	70	Single HN PGL	B			none
142	Germline	30	Single HN PGL	B			none
143	Germline	35	Single HN PGL	B			none
144	Germline	63	Single HN PGL	B			none
145	Germline	75	Single HN PGL	B			none
146	Germline	52	Single HN PGL	B			none
147	Germline	69	Single HN PGL	B			none
148	Germline	72	Single HN PGL	B			none
149	Germline	62	Single TAP PGL	B			none
150	Germline	65	Single TAP PGL	B			none
151	Germline	56	Single HN PGL	B			none
152	Germline	10	Single HN PGL	B			none
153	Germline	27	Single TAP PGL	B			none
154	Germline	25	Single TAP PGL	B			none
155	Germline	47	Multiple or recurrent PGL	B			none
156	Germline	45	Single TAP PGL	B			none
157	Germline	63	Single HN PGL	B			none
158	Germline	70	Single HN PGL	B			none
159	Germline	67	Single HN PGL	B			none
160	Germline	61	Single HN PGL	B			none
161	Germline	80	Single TAP PGL	B			none
162	Germline	50	Single TAP PGL	B			none
163	Germline	59	Single TAP PGL	B			none
164	Germline	58	Single HN PGL	B			none
165	Germline	68	Single HN PGL	B			none
166	Germline	69	Single HN PGL	B			none
167	Germline	23	Single HN PGL	B			none
168	Germline	51	Single TAP PGL	B			none
169	Germline	49	Single HN PGL	B			none
170	Germline	46	Single TAP PGL	B			none
171	Germline	76	Single TAP PGL	B			none
172	Germline	46	Multiple or recurrent PGL	B			none
173	Germline	58	Single TAP PGL	M			none
174	Germline	78	Single HN PGL	B			none
175	Germline	66	Single HN PGL	B			none
176	Germline	73	Single HN PGL	B			none
177	Germline	55	Single HN PGL	B			none
178	Germline	55	Multiple or recurrent PGL	B			none
179	Germline	22	Single HN PGL	B			none
180	Germline	25	Single HN PGL	B			none
181	Germline	30	Single HN PGL	B			none
182	Germline	51	Single TAP PGL	B			none
183	Germline	64	Single HN PGL	B			none
184	Germline	67	Single HN PGL	B			none
185	Germline	71	Single HN PGL	B			none
186	Germline	67	Single HN PGL	B			none
187	Germline	43	Single HN PGL	B			none
188	Germline	41	Single HN PGL	B			none
189	Germline	40	Single HN PGL	B			none
190	Germline	63	Single HN PGL	B			none
191	Germline	64	Single HN PGL	B			none
192	Germline	65	Single HN PGL	B			none
193	Germline	55	Single HN PGL	B			none
194	Germline	69	Single TAP PGL	B			none
195	Germline	47	Single HN PGL	B			none
196	Germline	77	Single TAP PGL	B			none
197	Germline	71	Single TAP PGL	B			none
198	Germline	60	Single HN PGL	B			none
199	Germline	69	Single HN PGL	B			none
200	Germline	25	Single TAP PGL	B			none
201	Germline	83	Single TAP PGL	B			none
202	Germline	64	Single TAP PGL	B			none
203	Germline	77	Single HN PGL	B			none
204	Germline	36	Single HN PGL	B			none
205	Germline	34	Single HN PGL	B			none
206	Germline	38	Single HN PGL	B			none
207	Germline	82	Single HN PGL	B			none
208	Germline	65	Single HN PGL	B			none
209	Germline	62	Single HN PGL	B			none
210	Germline	42	Single TAP PGL	B			none
211	Germline	61	Single HN PGL	B			none
212	Germline	65	Single HN PGL	B			none
213	Germline	80	Single HN PGL	B			none
214	Germline	56	Single TAP PGL	B			none
215	Germline	65	Single HN PGL	B			none
216	Germline	31	Single TAP PGL	B			none
217	Germline	74	Single HN PGL	B			none
218	Germline	60	Single HN PGL	B			none
219	Germline	65	Single TAP PGL	B			none
220	Germline	63	Single HN PGL	B			none
221	Germline	58	Single HN PGL	B			none
222	Germline	48	Single TAP PGL	B			none
223	Germline	57	Multiple or recurrent PGL	B			none
224	Germline	65	Single HN PGL	B			none
225	Germline	51	Single HN PGL	B			none
226	Germline	83	Single TAP PGL	B			none
227	Germline	42	Single HN PGL	B			none
228	Germline	20	Single HN PGL	B			none
229	Germline	60	Single HN PGL	B			none
230	Germline	52	Single HN PGL	B			none
231	Germline	65	Single HN PGL	B			none
232	Germline	63	Single HN PGL	B			none
233	Germline	50	Single TAP PGL	B			none
234	Germline	81	Single HN PGL	B			none
235	Germline	56	Single TAP PGL	B			none
236	Germline	57	Single HN PGL	B			none
237	Germline	61	Single HN PGL	B			none
238	Germline	55	Single HN PGL	B			none
239	Germline	58	Single HN PGL	B			none
240	Germline	47	Single HN PGL	B			none
241	Germline	60	Single HN PGL	B			none
242	Germline	65	Single TAP PGL	B			none
243	Germline	34	Single HN PGL	M			none
244	Germline	52	Single HN PGL	B			none
245	Germline	64	Single HN PGL	B			none
246	Germline	40	Single HN PGL	B			none
247	Germline	61	Single HN PGL	M			none
248	Germline	50	Single TAP PGL	B			none
249	Germline	71	Single HN PGL	B			none
250	Germline	51	Single HN PGL	B			none
251	Germline	66	Single HN PGL	B			none
252	Germline	60	Single HN PGL	B			none
253	Germline	61	Single HN PGL	M			none
254	Germline	32	Single HN PGL	B			none
255	Germline	34	Single HN PGL	B			none
256	Germline	54	Single TAP PGL	B			none
257	Germline	23	Single HN PGL	B			none
258	Germline	79	Single HN PGL	B			none
259	Germline	55	Multiple or recurrent PGL	B			none
260	Germline	38	Single HN PGL	B			none
261	Germline	70	Multiple or recurrent PGL	B			none
262	Germline	53	Single HN PGL	B			none
263	Germline	31	Single TAP PGL	B			none
264	Germline	66	Single HN PGL	B			none
265	Germline	24	Single HN PGL	B			none
266	Germline	44	Single HN PGL	B			none
267	Germline	32	Single HN PGL	B			none
268	Germline	35	Single HN PGL	B			none
269	Germline	63	Single HN PGL	B			none
270	Germline	67	Multiple or recurrent PGL	M			none
271	Germline	4	Single TAP PGL	B			none
272	Germline	25	Single HN PGL	B			none
273	Germline	32	Single TAP PGL	M			none
274	Germline	42	Multiple or recurrent PGL	M			none
275	Germline	42	Single TAP PGL	M			none
276	Germline	32	Single HN PGL	B			none
277	Germline	12	Single HN PGL	B			none
278	Germline	67	Single TAP PGL	M			none
279	Germline	28	Single HN PGL	B			none
280	Germline	35	Single HN PGL	B			none
281	Germline	35	Single HN PGL	B			none
282	Germline	15	Single TAP PGL	B			none
283	Germline	43	Single HN PGL	B			none
284	Germline	22	Single HN PGL	M			none
285	Germline	24	Single HN PGL	M			none
286	Germline	30	Single HN PGL	B			none
287	Germline	41	Single TAP PGL	M			none
288	Germline	30	Single PCC	M			none
289	Germline	22	Single PCC	B			none
290	Germline	53	Single PCC	B			none
291	Germline	29	Multiple or recurrent PGL	M			none
292	Germline	12	Single PCC	B			none
293	Germline	28	Single PCC	B			none
294	Germline	13	Single TAP PGL	M			none
295	Germline	18	Single TAP PGL	B			none
296	Germline	71	Multiple or recurrent PGL	B			none
297	Germline	33	Single PCC	M			none
298	Germline	26	Single PCC	B			none
299	Germline	57	Single PCC	B			none
300	Germline	69	Single PCC	B			none
301	Germline	54	Single PCC	B			none
302	Germline	30	Single PCC	B			none
303	Germline	73	Single PCC	B			none
304	Germline	57	Single PCC	M			none
305	Germline	66	Single PCC	M			none
306	Germline	50	Single PCC	B			none
307	Germline	27	Single PCC	B			none
308	Germline	34	Single PCC	B			none
309	Germline	62	Bilateral PCC	B			none
310	Germline	52	Single PCC	B			none
311	Germline	70	Bilateral PCC	B			none
312	Germline	34	Single PCC	B			none
313	Germline	30	Bilateral PCC	B			none
314	Germline	67	Single PCC	B			none
315	Germline	51	Single PCC	B			none
316	Germline	23	Single PCC	B			none
317	Germline	44	Single PCC	B			none
318	Germline	42	Single PCC	B			none
319	Germline	49	Single PCC	B			none
320	Germline	53	Single PCC	B			none
321	Germline	33	Single PCC	B			none
322	Germline	60	Single PCC	B			none
323	Germline	35	Single PCC	B			none
324	Germline	52	Single PCC	B			none
325	Germline	46	Single PCC	B			none
326	Germline	47	Single PCC	B			none
327	Germline	63	Single PCC	B			none
328	Germline	50	Single PCC	B			none
329	Germline	35	Single PCC	B			none
330	Germline	52	Single PCC	B			none
331	Germline	44	Single PCC	B			none
332	Germline	62	Single PCC	B			none
333	Germline	54	Single PCC	B			none
334	Germline	42	Single PCC	B			none
335	Germline	42	Single PCC	B			none
336	Germline	21	Single PCC	B			none
337	Germline	63	Single PCC	B			none
338	Germline	59	Single PCC	B			none
339	Germline	43	Single PCC	B			none
340	Germline	48	Single PCC	B			none
341	Germline	43	Single PCC	B			none
342	Germline	33	Single PCC	B			none
343	Germline	42	Single PCC	B			none
344	Germline	46	Single PCC	B			none
345	Germline	43	Single PCC	B			none
346	Germline	91	Single PCC	B			none
347	Germline	51	Single PCC	B			none
348	Germline	88	Single PCC	B			none
349	Germline	40	Single PCC	B			none
350	Germline	56	Single PCC	B			none
351	Germline	55	Single PCC	B			none
352	Germline	40	Single PCC	B			none
353	Germline	51	Single PCC	B			none
354	Germline	14	Single PCC	B			none
355	Germline	47	Single PCC	B			none
356	Germline	19	Single PCC	B			none
357	Germline	48	Bilateral PCC	B			none
358	Germline	40	Single PCC	B			none
359	Germline	63	Single PCC	B			none
360	Germline	70	Single PCC	B			none
361	Germline	60	Single PCC	B			none
362	Germline	45	Single PCC	M			none
363	Germline	65	Single PCC	M			none
364	Germline	21	Single PCC	B			none
365	Germline	59	Single PCC	B			none
366	Germline	61	Single PCC	B			none
367	Germline	70	Single PCC	B			none
368	Germline	86	Single PCC	B			none
369	Germline	44	Single PCC	B			none
370	Germline	62	Single PCC	B			none
371	Germline	67	Single PCC	B			none
372	Germline	69	Single PCC	B			none
373	Germline	29	Single PCC	B			none
374	Germline	70	Single PCC	B			none
375	Germline	40	Single PCC	B			none
376	Germline	53	Single PCC	B			none
377	Germline	45	Single PCC	B			none
378	Germline	50	Single PCC	B			none
379	Germline	56	Single PCC	B			none
380	Germline	54	Single PCC	B			none
381	Germline	63	Single PCC	B			none
382	Germline	47	Single PCC	B			none
383	Germline	54	Single PCC	B			none
384	Germline	64	Single PCC	B			none
385	Germline	37	Single PCC	B			none
386	Germline	70	Single PCC	B			none
387	Germline	76	Single PCC	B			none
388	Germline	63	Single PCC	B			none
389	Germline	37	Single PCC	B			none
390	Germline	64	Single PCC	B			none
391	Germline	72	Single PCC	B			none
392	Germline	74	Single PCC	B			none
393	Germline	43	Single PCC	M			none
394	Germline	45	Single PCC	M			none
395	Germline	63	Single PCC	B			none
396	Germline	51	Single PCC	B			none
397	Germline	31	Single PCC	B			none
398	Germline	48	Single PCC	B			none
399	Germline	80	Single PCC	B			none
400	Germline	31	Single PCC	B			none
401	Germline	61	Single PCC	B			none
402	Germline	54	Single PCC	B			none
403	Germline	40	Single PCC	B			none
404	Germline	40	Single PCC	B			none
405	Germline	63	Single PCC	B			none
406	Germline	58	Single PCC	B			none
407	Germline	53	Single PCC	B			none
408	Germline	66	Single PCC	B			none
409	Germline	44	Single PCC	B			none
410	Germline	8	Single PCC	B			none
411	Germline	23	Single PCC	B			none
412	Germline	48	Single PCC	B			none
413	Germline	77	Single PCC	B			none
414	Germline	21	Single PCC	B			none
415	Germline	31	Single PCC	B			none
416	Germline	45	Single PCC	B			none
417	Germline	52	Single PCC	B			none
418	Germline	45	Single PCC	B			none
419	Germline	70	Single PCC	B			none
420	Germline	57	Single PCC	B			none
421	Germline	19	Single PCC	B			none
422	Germline	61	Single PCC	B			none
423	Germline	68	Single PCC	B			none
424	Germline	48	Single PCC	B			none
425	Germline	36	Single PCC	B			none
426	Germline	70	Single PCC	B			none
427	Germline	86	Single PCC	B			none
428	Germline	60	Single PCC	B			none
429	Germline	76	Single PCC	B			none
430	Germline	50	Single PCC	B			none
431	Germline	61	Single PCC	B			none
432	Germline	63	Single PCC	B			none
433	Germline	31	Single PCC	B			none
434	Germline	46	Single PCC	B			none
435	Germline	67	Single PCC	B			none
436	Germline	69	Single PCC	B			none
437	Germline	50	Single PCC	M			none
438	Germline	53	Single PCC	B			none
439	Germline	46	Single PCC	B			none
440	Germline	47	Single PCC	B			none
441	Germline	48	Single PCC	B			none
442	Germline	64	Single PCC	B			none
443	Germline	34	Single PCC	B			none
444	Germline	36	Single PCC	B			none
445	Germline	28	Single PCC	B			none
446	Germline	52	Single PCC	B			none
447	Germline	30	Single PCC	B			none
448	Germline	65	Single PCC	B			none
449	Germline	47	Single PCC	M			none
450	Germline	65	Single PCC	B			none
451	Germline	66	Single PCC	M			none
452	Germline	47	Single PCC	B			none
453	Germline	46	Single PCC	B			none
454	Germline	39	Single PCC	B			none
455	Germline	52	Single PCC	B			none
456	Germline	19	Single PCC	B			none
457	Germline	67	Single PCC	B			none
458	Germline	65	Single PCC	B			none
459	Germline	32	Single PCC	B			none
460	Germline	24	Single PCC	B			none
461	Germline	53	Single PCC	B			none
462	Germline	65	Single PCC	B			none
463	Germline	56	Single PCC	B			none
464	Germline	33	Single PCC	B			none
465	Germline	59	Single PCC	B			none
466	Germline	55	Single PCC	B			none
467	Germline	17	Single PCC	B			none
468	Germline	44	Single PCC	B			none
469	Germline	51	Single PCC	B			none
470	Germline	66	Single PCC	B			none
471	Germline	67	Single PCC	B			none
472	Germline	61	Single PCC	B			none
473	Germline	68	Single PCC	B			none
474	Germline	55	Single PCC	B			none
475	Germline	64	Single PCC	B			none
476	Germline	47	Single PCC	B			none
477	Germline	68	Single PCC	B			none
478	Germline	30	Single PCC	B			none
479	Germline	49	Single PCC	B			none
480	Germline	55	Single PCC	B			none
481	Germline	44	Single PCC	B			none
482	Germline	54	Single PCC	B			none
483	Germline	35	Single PCC	B			none
484	Germline	58	Single PCC	B			none
485	Germline	68	Single PCC	B			none
486	Germline	38	Single PCC	B			none
487	Germline	74	Single PCC	B			none
488	Germline	45	Single PCC	B			none
489	Germline	51	Single PCC	B			none
490	Germline	91	Single PCC	B			none
491	Germline	38	Single PCC	B			none
492	Germline	29	Single PCC	B			none
493	Germline	48	Single PCC	B			none
494	Germline	30	Single PCC	B			none
495	Germline	61	Single PCC	B			none
496	Germline	84	Single PCC	B			none
497	Germline	61	Single PCC	B			none
498	Germline	52	Single PCC	B			none
499	Germline	51	Single PCC	B			none
500	Germline	41	Single PCC	B			none
501	Germline	47	Single PCC	M			none
502	Germline	69	Single PCC	B			none
503	Germline	71	Single PCC	B			none
504	Germline	53	Single PCC	B			none
505	Germline	61	Single PCC	B			none
506	Germline	78	Single PCC	B			none
507	Germline	15	Single PCC	B			none
508	Germline	38	Single PCC	B			none
509	Germline	35	Single PCC	B			none
510	Germline	36	Single PCC	M			none
511	Germline	65	Single PCC	B			none
512	Germline	26	Single PCC	B			none
513	Germline	35	Single PCC	B			none
514	Germline	18	Single PCC	B			none
515	Germline	56	Single PCC	B			none
516	Germline	35	Single PCC	B			none
517	Germline	35	Single PCC	B			none
518	Germline	52	Single PCC	M			none
519	Germline	28	Single PCC	B			none
520	Germline	60	Single PCC	B			none
521	Germline	37	Single PCC	B			none
522	Germline	64	Bilateral PCC	B			none
523	Germline	33	Single PCC	M			none
524	Germline	23	Single PCC	B			none
525	Germline	21	Single PCC	B			none
526	Germline	75	Single PCC	M			none
527	Germline	31	Single PCC	B			none
528	Germline	69	Single PCC	M			none
529	Germline	44	Single PCC	B			none
530	Germline	41	Single PCC	M			none
531	Germline	30	Single PCC	B			none
532	Germline	18	Single PCC	B			none
533	Germline	36	Single PCC	B			none
534	Germline	51	Single PCC	B			none
535	Germline	16	Single PCC	B			none
536	Germline	35	Single PCC	B			none
537	Germline	43	Multiple or recurrent PGL	B			none
538	Germline	21	Single PCC	B			none
539	Germline	32	Single PCC	M			none
540	Germline	48	Single PCC	B			none
541	Germline	81	Single PCC	B			none

## Sheet: germline&somatic analysis
Patient #	Analyzed DNA (Germline, tumor or both)	Age at diagnosis (years)	Tumor type	Benign/ Malignant	Personal and familial history	Germline/Somatic status	Gene	Variant (coding DNA)	Aminoacid change	Type of Variation	Current classification	cDNA analysis	SDHB IHC	SDHA IHC	2-SC IHC
542	Both	20	Single TAP PGL	B		somatic	FH	c.364_367del	p.Lys122Glnfs*5	frameshift	class 4
						somatic	FH	c.1178C>T	p.Ala393Val	missense	class 4
543	Both	21	Multiple or recurrent PGL	B		somatic	EPAS1	c.1589C>T	p.Ala530Val	missense	class 5
544	Both	42	Multiple or recurrent PGL	M		somatic	SDHD	c.284_285insAGGG	p.Ala96Glyfs*19	frameshift	class 4
545	Both	34	Single TAP PGL	B		germline	SDHD	c.158C>T	p.Pro53Leu	missense	class 3		negative	positive
						somatic	EPAS1	c.1592C>G	p.Pro531Arg	missense	class 5
546	Both	26	Single HN PGL	B		germline	SDHA	c.1775A>G	p.His592Arg	missense	class 5		negative	negative
						somatic	SDHA	c.1753C>T	p.Arg585Trp	missense	class 5		negative	negative
547	Both	50	Single TAP PGL	B		somatic	EPAS1	c.1591C>T	p.Pro531Ser	missense	class 5
548	Both	21	Single TAP PGL	B		somatic	VHL	c.482G>A	p.Arg161Gln	missense	class 5
549	Both	24	Single TAP PGL	B		mosaïc	SDHB	c.557G>A	p.Cys186Tyr	missense	class 5		negative	positive
550	Both	35	Multiple or recurrent PGL	M		somatic	EPAS1	c.1591C>T	p.Pro531Ser	missense	class 5
						somatic	EPAS1	c.1589C>T	p.Ala530Val	missense	class 5
551	Both	46	Single TAP PGL	B		germline	SDHA	c.1663+3G>C	p.?	splicesite	class 5	abnormal splicing	negative	negative
						somatic	SDHA	c.1765C>T	p.Arg589Trp	missense	class 5		negative	negative
552	Both	57	Single TAP PGL	B		germline	SDHA	c.771-21_771-13del	p.?	intronic	class 5	abnormal splicing		negative
553	Both	28	Single PCC	M		somatic	SDHB	c.563T>C	p.Leu188Pro	missense	class 5
554	Both	11	Single PCC	B		somatic	VHL	c.482G>A	p.Arg161Gln	missense	class 5
555	Both	67	Single PCC	B		somatic	VHL	c.463+1G>C	p.?	splicesite	class 5
556	Both	74	Single PCC	M		germline	EGLN2	c.547G>A	p.Val183Met	missense	class 3
557	Both	38	Single PCC	B		somatic	HRAS	c.182A>G	p.Gln61Arg	missense	class 5
558	Both	15	Single PCC	B		somatic	VHL	c.513_515del	p.Lys171_Pro172delinsAsn	in frame delins	class 3
559	Both	41	Single PCC	B		somatic	VHL	c.250G>T	p.Val84Leu	missense	class 5
560	Both	37	Bilateral PCC	B		somatic	HRAS	c.37G>C	p.Gly13Arg	missense	class 5
561	Both	NA	Single PCC	B		somatic	HRAS	c.182A>G	p.Gln61Arg	missense	class 5
562	Both	29	Single PCC	B		somatic	VHL	c.260T>A	p.Val87Glu	missense	class 4
563	Both	57	Single PCC	B		somatic	HRAS	c.182A>G	p.Gln61Arg	missense	class 5
564	Both	36	Single PCC	B	personal NF1	germline	NF1	c.2903T>G	p.Met968Arg	missense	class 5
565	Both	12	Bilateral PCC	B		mosaïc	VHL	c.482G>A	p.Arg161Gln	missense	class 5
566	Both	12	Multiple or recurrent PGL	B		somatic	EPAS1	c.1580_1599delinsGGATATAT	p.Glu527_Ile533delinsGlyIleTyr	in frame delins	class 3
567	Both	35	Single PCC	M		somatic	VHL	c.496G>T	p.Val166Phe	missense	class 5
568	Both	13	Multiple or recurrent PGL	B			none
569	Both	17	Single TAP PGL	B			none
570	Both	70	Single TAP PGL	B			none
571	Both	16	Single HN PGL	M			none
572	Both	15	Multiple or recurrent PGL	B			none
573	Both	27	Multiple or recurrent PGL	B			none
574	Both	61	Single PCC	B			none
575	Both	47	Single PCC	B			none
576	Both	20	Single PCC	B			none
577	Both	36	Multiple or recurrent PGL	B			none
578	Both	46	Single PCC	B			none
